1 Systematic review of cardiac adverse effects in children and young people under 18  
2 years of age after SARS-CoV-2 vaccination

3

4 Joana Cruz<sup>1</sup>

5 Amedine Duret<sup>2</sup>

6 Rachel Harwood<sup>3 4</sup>

7 Lorna K. Fraser<sup>5</sup>

8 Caroline B. Jones<sup>6</sup>

9 Joseph Ward<sup>1</sup>

10 Elizabeth Whittaker<sup>2 7</sup>

11 Simon E. Kenny<sup>2 7 8</sup>

12 Russell M. Viner<sup>1</sup>

13

14 <sup>1</sup>Population, Policy and Practice Department, UCL Great Ormond St. Institute of Child  
15 Health, London, UK

16 <sup>2</sup>Department of Paediatric Infectious Diseases, Imperial College Healthcare NHS Trust, Lon-  
17 don, UK

18 <sup>3</sup>Institute of Systems, Molecular and Integrative Biology, University of Liverpool, Liverpool,  
19 UK

20 <sup>4</sup>Department of Paediatric Surgery, Alder Hey Children's Hospital, Liverpool, UK

21 <sup>5</sup>Martin House Research Centre, University of York, York, UK

22 <sup>6</sup>Alder Hey Children's Hospital, Liverpool, UK

23 <sup>7</sup>Section of Paediatric Infectious Diseases, Faculty of Medicine, Imperial College London,  
24 London, UK

25 <sup>8</sup>NHS England and NHS Improvement, London, UK

26

## 27 Abstract

### 28 Background

29 Reports of myocarditis and pericarditis following vaccination with mRNA vaccines for SARS-  
30 CoV-2 have occurred after countries began vaccinating adolescents. We undertook a sys-  
31 tematic review of cardiac adverse effects associated with SARS-CoV-2 vaccine in children  
32 and young people (CYP) < 18 years.

### 33 Methods

34 Systematic review with protocol prospectively registered with PROSPERO  
35 (CRD42021275380).

36 Six electronic databases were searched from 1 December 2019 to 14 September 2021. Eligi-  
37 ble studies were those reporting on CYP with reported or proven myocarditis, pericarditis  
38 and/or myopericarditis associated with vaccination against SARS-CoV-2. We summarized  
39 findings across all clinical cases reported in case report / case series studies. As a number of  
40 studies reported data from two publicly available vaccine surveillance systems, we updated  
41 estimates of reporting rates for cardiac adverse events up to 31 October for the US Vaccine  
42 Adverse Event Reporting System (VAERS) and 13 November for EudraVigilance covering Eu-  
43 ropean Union and European Economic Area (EUEA) countries.

### 44 Results

45 Twenty-one studies were included from 338 identified records. Seventeen were case re-  
46 ports/series describing a total of 127 CYP. Three studies described reporting rates from pas-  
47 sive surveillance databases (VAERS, EudraVigilance, and the WHO VigiBase) and one de-  
48 scribed 22 cases from the US Vaccine Safety Datalink (VSD).

49 Clinical series reported that 99.2% presented with chest pain, 100% had raised troponin and  
50 73.8% had an abnormal ECG. Cardiovascular magnetic resonance (CMR) in 91 cases identi-  
51 fied myocardial injury in 61.5%, with 90.1% showing late gadolinium enhancement. NSAIDs  
52 were the most common treatment (76.0%).

53 One US dataset (VSD) estimated a significant excess of 29.6 events per million vaccine doses  
54 across both sexes and doses. There were 1129 reports of myocarditis and 358 reports of  
55 pericarditis from across the USA and EU/EEA. The VAERS reporting rate per million for myo-  
56 carditis was 12.4 for boys and 1.4 for girls after the first dose, and 49.6 for boys and 6.1 for  
57 girls after the second dose. There was a marked trend for VAERS reporting to be highest  
58 soon after initiation of the vaccine schedule, suggesting reporting bias.

### 59 Conclusions

60 Cardiac adverse effects are very rare after mRNA vaccination for COVID-19 in CYP <18 years.  
61 The great majority of cases are mild and self-limiting without significant treatment. No data  
62 are yet available on children under 12 years. Larger detailed longitudinal studies are ur-  
63 gently needed from active surveillance sources.

64

## 65 Introduction

66 The introduction of vaccines to protect against serious illness in SARS-Cov-2 has been highly  
67 effective <sup>1</sup>. However, there have been a number of case reports describing cardiac adverse  
68 effects, namely myocarditis, pericarditis and myopericarditis after SARS-CoV-2 vaccination <sup>2</sup>  
69 <sup>3</sup>. From May 2021 onward, several countries extended vaccination to include children and  
70 young people (CYP) aged 12-15 years old <sup>4,5</sup>. Soon after this, reports were published of cases  
71 of myocarditis in CYP after SARS-CoV-2 vaccination, especially in males <sup>6</sup>. Myocarditis and  
72 associated conditions have also been reported after SARS-CoV-2 infection, both with COVID-  
73 19 disease <sup>7-9</sup> and with the post-infectious paediatric multisystem inflammatory syndrome  
74 (PIMS) <sup>10</sup>, also known as multisystem inflammatory syndrome in children (MIS-C).

75 By October 2021, several reports had been published with wide variation in reported fre-  
76 quency of myocarditis after vaccination <sup>9,11,12</sup>. The frequency of myocarditis in these studies  
77 varied according to gender, age group and whether first or second dose administered <sup>13,14</sup>.

78 Estimates across broader age-groups using high-quality data sources suggest the risk of my-  
79 ocarditis was highest amongst young men, with estimated incidence after the first dose of  
80 106.9 per million amongst males 16-29 years,<sup>11</sup> and 13.4 and 150.7 per million after first and  
81 second doses respectively.<sup>12</sup> Males aged 12-15 years old appeared most affected, particu-  
82 larly after the second dose.<sup>13,14</sup>

83 As of early November 2021, over 50 million doses of mRNA vaccines have been given to 12-  
84 17 year olds across the USA<sup>15</sup> and European Union and European Economic Area<sup>16</sup> countries,  
85 with an additional 2.8 million doses given in the UK<sup>17</sup> and 3.1 million in Australia.<sup>18</sup>

86 Establishing the nature and frequency of vaccination adverse events such as myocarditis is  
87 essential to inform both national vaccination strategies and clinical decision-making for indi-  
88 viduals, particularly as nations expand adolescent vaccination and consider vaccinating  
89 younger children. We therefore undertook a systematic review of cardiac adverse effects  
90 associated with SARS-CoV-2 vaccine in those under 18 years.

91

## 92 Methods

93 We followed a standardised methodology and reported results according to Preferred Re-  
94 porting Items for Systematic Reviews and Meta-Analyses (PRISMA) <sup>19</sup> recommendations.  
95 The protocol was prospectively registered with PROSPERO (CRD42021275380).

### 96 Review question

97 What are the characteristics, frequency and natural history of cardiac adverse effects in chil-  
98 dren and young people (CYP) (<18 years old) after SARS-CoV-2 immunisation?

### 99 Search strategy

100 We systematically searched PubMed, MedRxiv, Europe PMC, World Health Organisation's  
101 COVID-19 Global Literature on Coronavirus Disease, Research Square and Google Scholar

102 from 1 December 2019 to 14 September 2021 for peer-reviewed papers and reports on car-  
103 diac adverse events caused by SARS-CoV-2 immunisation in CYP. The search strategy used  
104 the keywords “myocarditis” OR “pericarditis” OR “adverse effects” AND “covid-19” AND  
105 “vaccin\*” AND “children” OR “adolescent” OR “paediatric” in title or abstract of the refer-  
106 ence. The complete list of key word strings for each database can be found in supplemen-  
107 tary appendix (Table S1). The first 40 results from Google Scholar were also analysed, along  
108 with the databases of the US Vaccine Adverse Event Reporting System (VAERS)<sup>20</sup> and Eudra-  
109 Vigilance—the European database of suspected adverse drug reaction reports<sup>21</sup> for cases of  
110 myocarditis, pericarditis or myopericarditis related with SARS-CoV-2 vaccine in CYP aged be-  
111 tween 12-17 years old. We included adverse effects from mRNA-1273 (Moderna) and BNT  
112 162b2 (Pfizer) vaccines since they were the only vaccines approved for the age group <18  
113 years old at the time of writing of this paper.

#### 114 Eligibility

115 We included papers that reported myocarditis, pericarditis and/or myopericarditis associ-  
116 ated with vaccination against SARS-CoV-2 in CYP, aged <18 years old. Studies that also in-  
117 cluded individuals older than 18 years old were included if they allowed extraction of data  
118 on eligible individuals and/or age groups separately. We excluded studies on CYP SARS-CoV-  
119 2 vaccination trials (being underpowered), systematic reviews that mentioned cardiovascu-  
120 lar involvement but did not specify the above conditions, studies that included patients with  
121 cardiovascular conditions diagnosed prior to SARS-CoV-2 vaccination or that used non-hu-  
122 man models. Where multiple studies reported data from vaccine surveillance databases, we  
123 included only the most recent studies to avoid duplication.

#### 124 Study selection

125 The PRISMA flowchart is shown in figure 1. Our search identified 330 articles to which we  
126 added eight articles identified through the snowball technique. Titles and abstracts of po-  
127 tentially eligible articles and full-text review were scrutinised by one investigator (JC). Of  
128 those, 271 were ineligible based on criteria and 46 articles were excluded as duplicates, with  
129 21 articles included in this review.

#### 130 Data extraction

131 The following information was extracted from included studies: author and year of publica-  
132 tion, type of study (cohort, case report or case series), number of cases, case source, pa-  
133 tients’ sex, median age and range, vaccine type, percentage of patients presenting symp-  
134 toms after second vaccination, percentage of patients with symptoms resolved, median and  
135 range hospitalisation days and diagnoses of cardiac adverse effects. For the diagnostic crite-  
136 ria and treatment, we extracted the patients’ symptoms, troponin and c-reactive protein  
137 blood serum concentration, and observations from electrocardiogram, echocardiogram and  
138 cardiovascular magnetic resonance, as well as treatment provided. These data were ex-  
139 tracted to a spreadsheet by one reviewer (JC) and checked by two reviewers (JW, AD). They  
140 reached agreement regarding any conflicting results.

## 141 Quality evaluation

142 Quality evaluation of case reports/case series was assessed using the case-report (CARE) 13-  
143 item guideline<sup>22</sup>. This guideline comprises 30 sub-items. Each item ratings are 'yes' or 'no',  
144 and the final quality evaluation score was the sum of sub-items. The quality evaluation was  
145 performed independently by two reviewers (JC and AD) and in case of disagreement, a third  
146 reviewer (LF) made the final decision. Quality evaluation for each case report/case series are  
147 available in supplementary material (Table S2).

## 148 Data synthesis

149 We considered data from case reports/case series separately from the data extracted from  
150 databases reporting adverse effects of vaccination against SARS-CoV-2. Data from three pas-  
151 sive surveillance databases were used in included studies; the European Medicines Agency's  
152 European database of suspected adverse drug reaction reports (EudraVigilance, covering Eu-  
153 ropean Union and European Economic Area countries)<sup>21</sup>, the Centers for Disease Control  
154 (CDC) Vaccine Adverse Event Reporting System (VAERS, covering the USA),<sup>20</sup> and the World  
155 Health Organisation's global Individual Case Safety Report Database, VigiBase<sup>23</sup>. More than  
156 130 countries contribute to VigiBase although more than 85% of adverse effects caused by  
157 BNT162b2 (Pfizer) vaccine were reported from countries in Europe and America<sup>24</sup>. As  
158 above, we only included the most recent studies from these databases. Data were available  
159 from one active surveillance system, the CDC's Vaccine Safety Datalink (VSD)<sup>25</sup> which is a  
160 collaboration between the CDC and eight managed care organisations covering 3.6% of the  
161 US population. Participating VSD sites file weekly reports of medically-attended (clinic,  
162 emergency department or hospital) adverse events of COVID-19 vaccination for total 10.2  
163 million participants aged  $\geq 12$  years.

### 164 *Additional data*

165 We additionally updated estimates from EudraVigilance<sup>21</sup> and VAERS<sup>20</sup>. We calculated  
166 crude reporting rates for cardiac adverse events per million doses administered used the  
167 denominator being the sum of first dose and all fully vaccinated CYP as of 6 November 2021  
168 for European Union and European Economic Area countries<sup>16</sup> and 31 October 2021 for the  
169 USA.<sup>15</sup> For the USA, but not EU countries, we were also able to stratify adverse effects and  
170 calculate crude rates by sex and by dose, using data on proportional US adolescent vaccine  
171 uptake by sex following previous reports.<sup>26</sup> For EU/EEA countries, we considered a time lag  
172 of 7-days to consider both reporting lag and a pre-defined 7-day risk window, following previ-  
173 ous reports<sup>14</sup>; for USA VAERS, we used the vaccination month reported. For this dataset, we  
174 were able to repeat these analyses by month of vaccination from December 2020 to October  
175 2021.

## 176 Results

177 Our review included 21 articles<sup>14 23 27-44</sup> together with updated data from EudraVigilance<sup>21</sup>  
178 and VAERS<sup>20</sup>.

179 *Case series/case reports*

180 Seventeen articles were case reports or series that described between one<sup>31 34 35 40</sup> and 31<sup>32</sup>  
181 patients aged <18 years, with a total sample of 127 (see Table 1). Most were from the USA  
182 (82%)<sup>28-30 32-38 40-43</sup>, with 2 from Israel<sup>27 39</sup> and 1 from Germany<sup>31</sup>. 92.1% of cases were male  
183 and the median age ranged between 15 and 17 years. Sixteen described occurrence of car-  
184 diac adverse events after vaccination with BNT162b2 (Pfizer) vaccine and one study included  
185 cases after Pfizer or Moderna (mRNA-1273) vaccines<sup>32</sup>. Events were observed after admin-  
186 istration of second dose (92.1%) with onset symptoms within 2<sup>27 28 32 33 39 41-43</sup> and 4.5<sup>30</sup>  
187 days (median).

188 Sixty-four patients had myocarditis<sup>27 29 31-33 35 36 38 40 42 43</sup> and 56 myopericarditis.<sup>28 30 34 37 39 41</sup>  
189 A further 14 patients aged 12-20 years in one study<sup>32</sup> were considered to have clinically sus-  
190 pected myocarditis although the number 12-17 years was not specified. No patients 0-17  
191 years died of cardiac adverse effects after vaccination in any study. Where reported, the  
192 median hospitalisation days ranged between 2<sup>29 37 41</sup> and 7<sup>31</sup> days, and all made full clinical  
193 recovery<sup>28 30-37 39 42 43</sup> except 14 patients<sup>29 33 42</sup>. In the latter cases, at the time of discharge,  
194 three patients had mildly elevated troponin levels, one had persistent borderline low left  
195 ventricular systolic function on echocardiogram (EF 54%) and another had non-sustained  
196 ventricular tachycardia.<sup>29</sup> Three patients had abnormal cardiovascular magnetic resonance  
197 (CMR) results with late gadolinium enhancement (LGE).<sup>29</sup> Six patients' ECGs, at follow-up,  
198 revealed persistent changes, either nonspecific T-wave changes<sup>33 29</sup>, T-wave inversion<sup>29</sup> or  
199 a repolarisation abnormality.<sup>42</sup> Clinical and laboratory findings and treatment given are  
200 summarized across the 17 case studies/series in Table 2. Presentation was most commonly  
201 with acute chest pain followed by fever and shortness of breath (Table 2). All patients had  
202 an elevated troponin (more significant in those with myocarditis) and most a raised CRP.  
203 73.8% of patients had an abnormal ECG at presentation, typically with ST elevation or dif-  
204 fuse ST changes in addition to T wave inversion. Echocardiographic assessment showed nor-  
205 mal left ventricular wall geometry and preserved systolic function in the majority. CMR im-  
206 aging was undertaken in 91 cases with findings suggesting myocardial injury including 56  
207 (61.5%) with myocardial oedema and 82 (90.1%) with LGE. Systolic or diastolic dysfunction  
208 was only evident in 5.6% and 7.7%, by echo or CMR assessment, respectively, and 11.3%  
209 and 20.9% of patients were noted to have pericardial effusion also by echo or CMR assess-  
210 ment.

211 Treatment most commonly used nonsteroidal anti-inflammatory agents (NSAIDs; 76.0%).  
212 Small numbers (14.9%) were treated with corticosteroids. Immunomodulatory therapy in  
213 the form of IVIG was used in 19.8% as treatment for myocarditis. Small numbers received  
214 diuretics or angiotensin-converting enzyme (ACE) inhibitors (Enalapril; 1.7%) to treat left  
215 ventricular systolic dysfunction, or colchicine (2.5%) to prevent recurrent pericarditis. No pa-  
216 tients required inotropic or mechanical support. Two (1.7%) patients required no treatment.

217 *SARS-CoV-2 vaccination adverse effects reported from databases – systematic review*

218 Three included studies used data extracted from passive vaccine surveillance systems, the  
219 EudraVigilance<sup>44</sup>, VAERS<sup>20 44</sup> and VigiBase<sup>23</sup> databases with most recent data being from 30  
220 June 2021 (VigiBase<sup>23</sup>), 6 August 2021 (EudraVigilance<sup>44</sup>) and 18 August 2021 (VAERS<sup>20</sup>).

221 We included also a study using Vaccine Safety Database (VSD) data, which included three  
222 reports.<sup>45-47</sup>

223 VAERS data on reported cases of myocarditis per million amongst US 12-15 year old boys  
224 were 4.8 and 42.6 for first and second dose of the Pfizer vaccine<sup>14</sup>. For girls of the same age  
225 group, the cases of myocarditis were 0.5 and 4.3 per million of per million of first and sec-  
226 ond dose of Pfizer vaccine, respectively<sup>14</sup>. For age group 16-17, the number of cases in-  
227 creased. After the first dose, there were 5.2 and 0.0 cases of myocarditis per million of Pfizer  
228 vaccine administrated, in boys and girls respectively<sup>14</sup>. After the second dose, the numbers  
229 increased to 71.5 and 8.1 cases per million of Pfizer vaccine administrated, respectively<sup>14</sup>.  
230 Cases of myocarditis after administration of Moderna vaccine were only reported in boys  
231 aged 16-17; after the second dose, 31.2 cases per million of Moderna vaccine adminis-  
232 trated.<sup>14</sup>

233 Only one study published data extracted from EudraVigilance, reporting 61 cases of myocar-  
234 ditis and 14 of pericarditis, in CYP aged 12-17 years, after at least one dose of Pfizer or  
235 Moderna vaccines, by 6 August 2021<sup>44</sup>. These adverse cardiac effects affected mostly boys  
236 (myocarditis: 87%; pericarditis: 64.3%) and were predominantly after Pfizer vaccine (myo-  
237 carditis: 98.3%; pericarditis: 100%) rather than Moderna vaccines<sup>44</sup>. Relationship to dose-  
238 number and frequency of events per million doses were not available for 12-17 year olds.  
239 Whilst some deaths were reported post-vaccine across all ages, data were not available to  
240 identify whether within the CYP age-range.

241 The study from VigiBase reported 291 events after the Pfizer vaccine and 3 after the  
242 Moderna vaccine; 249 events were myocarditis and 45 were pericarditis, with no deaths  
243 amongst the 12-17 year age-group<sup>23</sup>. Compared with females, the odds of myocarditis was  
244 12.0 (95% CI: 7.9-18.3) for males 12-17 years, with odds for pericarditis amongst boys com-  
245 pared with girls being 12.7 (95% CI: 4.5-35.5)<sup>23</sup>.

246 The study using VSD data (3 reports)<sup>45-47</sup> identified 22 events in the 21 days after SARS-CoV-  
247 2 vaccination amongst US 12-17 year olds in data from December 2020 to 21 August 2021.  
248 These were a subgroup of a larger sample of 100 cases amongst 12-39 year olds of which 78  
249 (78%) were considered to be true cases of myo- or pericarditis after expert review. Amongst  
250 the 22 proven cases in 12-17 year olds, 50% (n=11) had acute myocarditis, 45% (10) myoper-  
251 icarditis and 5% (1) had acute pericarditis. All (22) presented with chest pain and 64% (14)  
252 had shortness of breath. 95% (21) had elevated troponin, 73% (16) had an abnormal ECG  
253 and 43% (9/21) had an abnormal echocardiogram. 82% (18) were male with a median onset  
254 of symptoms of 2 days. 86% (19) were hospitalised (32% (7) to intensive care) and all were  
255 discharged home, with 59% discharged within 2 days.<sup>45</sup> Using additional data to 10 Septem-  
256 ber 2021<sup>46</sup> on 12-17 year olds, they estimated that for the Pfizer vaccine only (30 confirmed  
257 events), there was a significant excess of 29.6 events per million vaccine doses across both  
258 sexes and doses, when compared with vaccinated adolescents 22-42 days after each dose,  
259 adjusted for site, sex, ethnicity and date. Estimates were 3.8 per million for first doses (not  
260 significantly different to zero) and 56.7 per million (significantly different to zero, confidence  
261 intervals not reported) for second doses. Three-month follow-up data were available on 16

262 of the cohort after Pfizer-BioNTech vaccination, of whom 4 (25%) were still symptomatic  
263 and 2 (13%) remained on medication, although no data were available on a control group.

264 *Updated data on SARS-CoV-2 vaccination adverse effects from VAERS and EudraVigilance*  
265 We updated the data on cardiac events post vaccination amongst 0-17 year olds in VAERS  
266 and EudraVigilance to the latest available data at the time of writing (17 November 2021)  
267 (Table 3; Figure 2).

268 In the USA, 406 cases of myocarditis and 120 of pericarditis were reported to VAERS<sup>20</sup> by 31  
269 October 2021. In the EU/EEA, 723 cases of myocarditis and 238 of pericarditis were reported  
270 by 13 November 2021 (Table 3). Total number of cardiac events were not calculated due to  
271 potential duplicate reporting across these categories.

272 Two reports recorded death after Pfizer vaccination. One from VAERS was a 15 year old  
273 male who died of drowning five days after his second vaccine dose. Autopsy identified in-  
274 creased left ventricular wall thickness and a small focus of myocardial inflammation but a  
275 normal pericardium. Genetic analysis of 92 genes associated with inherited cardiomyopa-  
276 thies and arrhythmias identified two variants of unknown significance. The second, from Eu-  
277 draVigilance, was a health professional report of the death of a 12-17 year old male after his  
278 second vaccine dose, with no further data beyond myocarditis, headache and fever.

279 Figure 2 shows the reporting rate of myocarditis and pericarditis in these two datasets. The  
280 rate in the reporting EU/EEA countries was 27.9 and 9.2 cases respectively of myocarditis  
281 and pericarditis per million vaccines administered.<sup>21</sup> For the USA, the reporting rate was  
282 16.2 and 4.8 cases per million of SARS-CoV-2 respectively.<sup>15</sup> A higher percentage of male ad-  
283 olescents than females reported cardiac adverse effects for both conditions studied (myo-  
284 carditis: 86.6% (EU/EEA)<sup>21</sup> and 88.7% (USA)<sup>20</sup>; pericarditis: 72.3% (EU/EEA)<sup>21</sup> and 85.8%  
285 (USA)<sup>20</sup>) (Table 3).

286 Only the USA VAERS provided data on the relationship of adverse events to vaccine dose;  
287 the rate of myocarditis per million after first dose was 12.4 for boys and 1.4 for girls, and  
288 49.6 for boys and 6.1 for girls after the second dose. The reporting rate of pericarditis fol-  
289 lowed a similar trend. Across both sexes, the majority of cardiac events were reported after  
290 the second dose (myocarditis: 77.1%; pericarditis: 75.0%).

291 Again, only VAERS provided data on time to onset of symptoms and duration of hospitalisa-  
292 tion. Median onset of symptoms was two days (range: 0 to > 120 days) after immunisation  
293<sup>20</sup>. The median days that CYP were hospitalised was two (ranging from no need of hospitali-  
294 sation to two months)<sup>20</sup>.

295 VAERS data for myocarditis and pericarditis events by month of vaccination are shown in  
296 Figure 3. For myocarditis, these show a trend for events after first and second doses to be  
297 higher soon after initiation of that element of the vaccine schedule (February 2021 for first  
298 dose, April 2021 for second doses). Incidence of events after second dose fell each month  
299 from July onwards, a pattern also seen in females. In the most recent months (September-  
300 October 2021), incidence of myocarditis after first doses was 7.6-12.3 in males and 0 in fe-  
301 males, and after second dose 13.1-31.1 for males and 1.3-2.5 per million for females.



302 Incidence of pericarditis after the second dose in males appeared to follow a similar trend,  
303 being highest in February and April 2021 and falling thereafter. Incidence in the most recent  
304 two months was 2.6-4.1 per million for males and 0-1.3 for females.

## 305 Discussion

306 Our systematic review provides a comprehensive and up-to-date (November 2021) synthe-  
307 sis of reported data on cardiac adverse effects in CYP < 18 years after SARS-CoV-2 immunisa-  
308 tion. Detailed clinical data were available on 127 cases across 17 studies, active surveillance  
309 data on 30 confirmed cases, and passive surveillance data on 1129 reports of myocarditis  
310 and 358 reports of pericarditis from across the USA and EU/EEA. It is highly likely that some  
311 or all of the clinical cases and active surveillance cases were contained within the passive  
312 surveillance reports. Events were also reported through the WHO VigiBase database, alt-  
313 hough the degree to which these events overlapped with the US and EU/EEA reports is un-  
314 clear as these countries make up around 70% of VigiBase reports.

315 Clinical data were highly consistent across the three sources of data. The majority of cases  
316 occurred in males aged 15-17 years old who presented with chest pain, elevated serum tro-  
317 ponin and C-reactive protein and an abnormal ECG with ST elevation. Fewer presented un-  
318 der age 15 years. We identified no cases under 12 years of age although very few doses  
319 have been given in this age group. Most presented with chest pain around 2 days after vac-  
320 cination, predominantly their second dose. Almost all had high troponin levels, 73.8% had  
321 an abnormal ECG with variable echocardiography findings. Approximately 85% were hospi-  
322 talised for short periods, with the great majority discharged within 2-7 days without treat-  
323 ment other than non-steroidal anti-inflammatory drugs. While longer-term data were only  
324 available on 16 young people from the VSD study, few remained on medication at 3 months.  
325 The clinical picture of myocarditis post-COVID-19 vaccination amongst 12-17 year olds was  
326 broadly similar to that previously reported across all ages.<sup>11 12</sup>

327 There were no deaths in the clinical series nor in the active surveillance series, and none in  
328 the clinical series required significant cardiovascular or respiratory support. There were two  
329 male deaths reported in the passive surveillance data, although a causal link cannot be at-  
330 tributed to vaccination, given that all deaths within a 21 day period after vaccination maybe  
331 reported regardless of causation. It is important to note that in 2019 in the USA there were  
332 approximately 12 deaths males aged 12-17 years each day, with approximately 250 occur-  
333 ring in the average 21 day period, from a range of traumatic and medical causes.<sup>48</sup> Given  
334 that over 40% of 12-17 year olds in the USA have had at least one dose,<sup>26</sup> this suggests that  
335 there are likely to be a considerable number of deaths of adolescent boys soon after vac-  
336 cination for reasons entirely unconnected with vaccination. Broader analysis of VAERS re-  
337 ports of deaths from myocarditis associated with COVID-19 vaccination across a broader  
338 age-group is reassuring that almost all reported cases are not vaccination-related. As of  
339 early November, 8 deaths were identified in those aged <30 years with possible concern for  
340 myocarditis after approximately 86 million vaccine doses; 3 were assessed as not being my-  
341 ocarditis, 3 as due to infectious (i.e. non-vaccine) myocarditis whilst evaluation was ongoing  
342 in 2 cases.<sup>47</sup>

343 Data from active surveillance suggest a significant excess of confirmed myo- or pericarditis  
344 events in the 21 days post-vaccination compared with matched adolescents 22-42 days after  
345 vaccination, supporting a causal link for myocarditis with the Pfizer-BioNTech vaccine alt-  
346 hough numbers of events were low in this age-group. Passive surveillance data from VAERS  
347 and EudraVigilance provide an estimate of the reporting rate for unconfirmed events and  
348 cannot infer causality. These differences in data quality and estimation methods means that  
349 estimates are not directly comparable across the datasets, although estimates were broadly  
350 similar. Overall estimates across both sexes and both doses across the period were approxi-  
351 mately 30 per million for myo-pericarditis for VSD and 17 and 28 per million for myocarditis  
352 in VAERS and EudraVigilance respectively. Estimates for events post first dose were approxi-  
353 mately 4 per million from VSD and 1.4 and 12.4 for females and males respectively in VAERS.

354 However the time trends we identified in VAERS data for males suggest that the summary  
355 estimates across the study period are highly likely to be biased upwards. Estimates were  
356 higher amongst males after the second dose across the study period, however the monthly  
357 crude estimate decreased notably in the most recent 3 months. Whilst the most recent  
358 month may be lower due to incomplete reporting, previous studies showing higher levels of  
359 reporting in VAERS following publicity relating to claimed adverse events,<sup>49</sup> suggest that  
360 lower estimates from August and September 2021 (31.1-39.7 per million second doses) may  
361 be less biased, although trends may be continuing. It is unclear whether similar trends have  
362 occurred in notifications to EudraVigilance as trend data are not publicly available. Whilst  
363 there was no similar trend for events post first dose, it is notable that passive surveillance  
364 reports from the UK, which began vaccinating healthy adolescents from September 2021,  
365 more recently than the USA or many EU countries, identified a reporting rate of 0.8 events  
366 per million amongst 0-17 year olds after approximately 2.8 million doses of the Pfizer-BioN-  
367 Tech vaccine, the great majority being first doses.<sup>50</sup>

368 Post-vaccination myocarditis must be seen in the context of myocarditis related to SARS-  
369 CoV-2 infection, post-COVID syndromes and other causes of myocarditis. A large Israeli  
370 study found the risk of vaccine-related myocarditis was found to be approximately 4-fold  
371 less than the risk of myocarditis due to SARS-CoV-2 infection across age-groups,<sup>9</sup> although  
372 similar data are not available for the adolescent age-range. The post-COVID-19 Paediatric  
373 Inflammatory Multisystem Syndrome (PIMS) has well described cardiovascular involvement.  
374 Paediatric patients may present with cardiogenic shock, ECG abnormalities, myocardial dys-  
375 function and coronary artery dilation <sup>10</sup>, with 71-75% patients being admitted to Paediatric  
376 Intensive Care Unit (PICU) <sup>51 52</sup> although the risk of death is very low.<sup>53</sup> Further, the clinical  
377 picture and outcomes of myocarditis post-COVID-19 vaccination appear quite different to  
378 established causes of acute myocarditis in CYP, which occurs in around 8 per million CYP<sup>54</sup>  
379 and has a higher incidence of left ventricular dysfunction and arrhythmia, median length of  
380 stay 6-7 days,<sup>54 55</sup> and mortality of up to 3-8%.<sup>54 56 57</sup>

381 Other vaccines have rarely been linked with cardiac adverse effects.<sup>58 59 60</sup> A reviewed of  
382 VAERS reports of myopericarditis after vaccination between 1990 and 2018 found 99 re-  
383 ports of myopericarditis in CYP, with most cases reported after *Haemophilus influenza* type  
384 b (22, 22%) and hepatitis B (18, 18%) vaccination <sup>60</sup>. Most cases reported were in males (55,

385 56%), of high severity (40, 40%), and resulted in death in 55% of cases,<sup>60</sup> although this may  
386 reflect biased reporting only of severe cases.

### 387 *Limitations*

388 Our findings are subject to a number of limitations inherent in systematic reviews and in the  
389 data sources used. Publication bias towards greater severity is likely amongst the cases re-  
390 ported in the 17 case study/series studies, which may not be representative of the less se-  
391 vere cases.

392 Estimates from vaccine passive surveillance systems such as VAERS and EudraVigilance pro-  
393 vide a reporting rate rather than an estimate of excess events, and are crude indicators of  
394 risks related to vaccines.<sup>61</sup> They cannot attribute causality between vaccine and reported  
395 event, lack a comparison group, data quality is highly variable and they are open to a series  
396 of biases from over- and -under-reporting.<sup>62</sup> VAERS in particular has been criticised as open  
397 to over-reporting by those opposed to COVID-19 vaccination.<sup>63 64</sup> However all reports are  
398 regularly scrutinized to remove duplicate and reports identified as fraudulent,<sup>62</sup> although  
399 the extent and timeliness of this is unclear. Passive surveillance systems are most useful for  
400 identifying potential safety signals that require further investigation<sup>62</sup> through more de-  
401 tailed smaller studies using active systems such as the Vaccine Safety Datalink (VSD). The  
402 VSD data included here provide an estimate of excess events, but the VSD can lack power to  
403 examine small risks in specific populations<sup>25</sup> such as the CYP studied here.

404 Our data focus on 12-17 year olds and should not be regarded as informative for younger  
405 children, as very few received COVID-19 vaccination during the period of study here. We  
406 were unable to include data from some large all-age studies<sup>12</sup> as these did not provide data  
407 specifically for those <18y. We were unable to further breakdown VAERS data by age within  
408 the adolescent range; a CDC report from October 2021 reported that pooled risk for 16-17  
409 year olds was higher after the second dose (69.1 per million) than amongst 12-15 year olds  
410 (39.9 per million).<sup>47</sup> We estimated sex-specific reporting rates from VAERS data using pro-  
411 portional differences in vaccine uptake in US adolescents. We were unable to compare risk  
412 of cardiac events after the Pfizer-BioNTech and Moderna vaccines in this age group due to  
413 lack of data. We were further unable to comment on risk of myocarditis after third doses  
414 due to lack of data as no country has introduced booster doses for this age-group.

### 415 *Conclusions*

416 Cardiac adverse effects are very rare after use of mRNA vaccination for COVID-19 in CYP <18  
417 years. The great majority of cases are mild and self-limiting without significant treatment, in  
418 contrast to viral myocarditis. No data are yet available on children under 12 years and these  
419 are awaited as vaccination of 5 to 11 year olds is rolled-out in some countries. Larger de-  
420 tailed prospective longitudinal studies from active surveillance sources on both children and  
421 adolescents are urgently needed to better understand the frequency and natural history of  
422 the condition.

423

424

## 425 Funding

426 JC, SEK and RMV are in receipt of a grant from the National Institute of Health Research to  
427 support this work (grant number NIHR202322). LKF is funded by a National Institute for  
428 Health Research (NIHR) Career Development Fellowship (award CDF-2018-11-ST2-002).

429 Funders had no role in the design, data collection, analysis, decision to publish, or prepara-  
430 tion of the manuscript.

431

## 432 References

- 433 1. Evans SJW, Jewell NP. Vaccine Effectiveness Studies in the Field. *N Engl J Med*  
434 2021;385(7):650-51. doi: 10.1056/NEJMe2110605 [published Online First:  
435 2021/07/22]
- 436 2. Diaz GA, Parsons GT, Gering SK, et al. Myocarditis and Pericarditis After Vaccination for  
437 COVID-19. *JAMA* 2021;326(12):1210-12. doi: 10.1001/jama.2021.13443 [published  
438 Online First: 2021/08/05]
- 439 3. Simone A, Herald J, Chen A, et al. Acute Myocarditis Following COVID-19 mRNA  
440 Vaccination in Adults Aged 18 Years or Older. *JAMA Intern Med* 2021 doi:  
441 10.1001/jamainternmed.2021.5511 [published Online First: 2021/10/05]
- 442 4. European Medicines Agency (EMA). COVID-19 vaccine Spikevax approved for children  
443 aged 12 to 17 in EU European Medicines Agency (EMA)2021 [Available from:  
444 [https://www.ema.europa.eu/en/news/covid-19-vaccine-spikevax-approved-](https://www.ema.europa.eu/en/news/covid-19-vaccine-spikevax-approved-children-aged-12-17-eu)  
445 [children-aged-12-17-eu](https://www.ema.europa.eu/en/news/covid-19-vaccine-spikevax-approved-children-aged-12-17-eu) accessed 05/10/2021 2021.
- 446 5. US Food & Drug Administration. Comirnaty and Pfizer-BioNTech COVID-19 Vaccine: US  
447 FDA; 2021 [Available from: [https://www.fda.gov/emergency-preparedness-and-](https://www.fda.gov/emergency-preparedness-and-response/coronavirus-disease-2019-covid-19/comirnaty-and-pfizer-biontech-covid-19-vaccine)  
448 [response/coronavirus-disease-2019-covid-19/comirnaty-and-pfizer-biontech-covid-](https://www.fda.gov/emergency-preparedness-and-response/coronavirus-disease-2019-covid-19/comirnaty-and-pfizer-biontech-covid-19-vaccine)  
449 [19-vaccine](https://www.fda.gov/emergency-preparedness-and-response/coronavirus-disease-2019-covid-19/comirnaty-and-pfizer-biontech-covid-19-vaccine) accessed 05/10/2021 2021.
- 450 6. Vogel G, Couzin-Frankel J. Israel reports link between rare cases of heart inflammation  
451 and COVID-19 vaccination in young men. *Science* 2021;10
- 452 7. Ojha V, Verma M, Pandey NN, et al. Cardiac Magnetic Resonance Imaging in Coronavirus  
453 Disease 2019 (COVID-19): A Systematic Review of Cardiac Magnetic Resonance  
454 Imaging Findings in 199 Patients. *J Thorac Imaging* 2021;36(2):73-83. doi:  
455 10.1097/rti.0000000000000574 [published Online First: 2020/12/12]
- 456 8. Boehmer TK, Kompaniyets L, Lavery AM, et al. Association Between COVID-19 and  
457 Myocarditis Using Hospital-Based Administrative Data - United States, March 2020-  
458 January 2021. *MMWR Morb Mortal Wkly Rep* 2021;70(35):1228-32. doi:  
459 10.15585/mmwr.mm7035e5 [published Online First: 2021/09/03]
- 460 9. Barda N, Dagan N, Ben-Shlomo Y, et al. Safety of the BNT162b2 mRNA Covid-19 Vaccine in  
461 a Nationwide Setting. *N Engl J Med* 2021;385(12):1078-90. doi:  
462 10.1056/NEJMoa2110475 [published Online First: 2021/08/26]
- 463 10. Alsaied T, Tremoulet AH, Burns JC, et al. Review of Cardiac Involvement in Multisystem  
464 Inflammatory Syndrome in Children. *Circulation* 2021;143(1):78-88. doi:  
465 10.1161/circulationaha.120.049836 [published Online First: 2020/11/10]
- 466 11. Witberg G, Barda N, Hoss S, et al. Myocarditis after Covid-19 Vaccination in a Large  
467 Health Care Organization. *N Engl J Med* 2021 doi: 10.1056/NEJMoa2110737  
468 [published Online First: 2021/10/07]
- 469 12. Mevorach D, Anis E, Cedar N, et al. Myocarditis after BNT162b2 mRNA Vaccine against  
470 Covid-19 in Israel. *N Engl J Med* 2021 doi: 10.1056/NEJMoa2109730 [published  
471 Online First: 2021/10/07]
- 472 13. Gargano JW, Wallace M, Hadler SC, et al. Use of mRNA COVID-19 Vaccine After Reports  
473 of Myocarditis Among Vaccine Recipients: Update from the Advisory Committee on  
474 Immunization Practices - United States, June 2021. *Mmwr-Morbidity and Mortality*  
475 *Weekly Report* 2021;70(27):977-82.
- 476 14. Su JR. Myopericarditis following COVID-19 vaccination: Updates from the Vaccine  
477 Adverse Event Reporting System (VAERS) CDC COVID-19 Vaccine Task Force, 2021.

- 478 15. Centers for Disease Control and Prevention. COVID-19 Vaccination Demographics in the  
479 United States, National 15/09/2021 ed. CDC, 2021.
- 480 16. European Centre for Disease Prevention and Control (ECDC). COVID-19 Vaccine Tracker.  
481 Stockholm: ECDC, 2021.
- 482 17. Coronavirus vaccine - weekly summary of Yellow Card reporting: updated 19 November  
483 2021: Medicines and Healthcare products Regulatory Agency (MHRA), 2021.
- 484 18. COVID-19 vaccination – vaccination data – 1 November 2021: Australian Government -  
485 Department of Health, 2021.
- 486 19. Moher D, Liberati A, Tetzlaff J, et al. Preferred Reporting Items for Systematic Reviews  
487 and Meta-Analyses: The PRISMA Statement. *PLOS Medicine* 2009;6(7):e1000097.  
488 doi: 10.1371/journal.pmed.1000097
- 489 20. Centers for Disease Control and Prevention. The Vaccine Adverse Event Reporting  
490 System (VAERS) results. September 3, 2021. VAERS, 2021.
- 491 21. European Medicines Agency (EMA). Eudravigilance - European database of suspected  
492 adverse drug reaction reports, 2021.
- 493 22. Riley DS, Barber MS, Kienle GS, et al. CARE guidelines for case reports: explanation and  
494 elaboration document. *J Clin Epidemiol* 2017;89:218-35. doi:  
495 <https://doi.org/10.1016/j.jclinepi.2017.04.026>
- 496 23. Chouchana L, Blet A, Al-Khalaf M, et al. Cardiac Inflammation after COVID-19 mRNA  
497 Vaccines: A Global Pharmacovigilance Analysis. *medRxiv* 2021:2021.08.12.21261955.  
498 doi: 10.1101/2021.08.12.21261955
- 499 24. World Health Organisation (WHO). VigiAccess. Comirnaty: WHO, 2021.
- 500 25. Baggs J, Gee J, Lewis E, et al. The Vaccine Safety Datalink: A Model for Monitoring  
501 Immunization Safety. *Pediatrics* 2011;127(Supplement\_1):S45-S53. doi:  
502 10.1542/peds.2010-1722H
- 503 26. Murthy BP, Zell E, Saelee R, et al. COVID-19 Vaccination Coverage Among Adolescents  
504 Aged 12-17 Years - United States, December 14, 2020-July 31, 2021. *Mmwr-*  
505 *Morbidity and Mortality Weekly Report* 2021;70(35):1206-13.
- 506 27. Abu Mouch S, Roguin A, Hellou E, et al. Myocarditis following COVID-19 mRNA  
507 vaccination. *Vaccine* 2021;39(29):3790-93. doi: 10.1016/j.vaccine.2021.05.087  
508 [published Online First: 2021/06/08]
- 509 28. Das BB, Kohli U, Ramachandran P, et al. Myopericarditis after messenger RNA  
510 Coronavirus Disease 2019 Vaccination in Adolescents 12 to 18 Years of Age. *J Pediatr*  
511 2021;238:26-32. doi: <https://doi.org/10.1016/j.jpeds.2021.07.044> [published Online  
512 First: 2021/08/03]
- 513 29. Dionne A, Sperotto F, Chamberlain S, et al. Association of Myocarditis With BNT162b2  
514 Messenger RNA COVID-19 Vaccine in a Case Series of Children. *JAMA Cardiol* 2021  
515 doi: 10.1001/jamacardio.2021.3471 [published Online First: 2021/08/11]
- 516 30. Fleming-Nouri A, Haimovich AD, Yang D, et al. Myopericarditis in young adults  
517 presenting to the emergency department after receiving a second COVID-19 mRNA  
518 vaccine. *Acad Emerg Med* 2021;28(7):802-05. doi: 10.1111/acem.14307 [published  
519 Online First: 2021/07/27]
- 520 31. Isaak A, Feisst A, Luetkens JA. Myocarditis Following COVID-19 Vaccination. *Radiology*  
521 2021;301(1):E378-E79. doi: 10.1148/radiol.2021211766 [published Online First:  
522 2021/08/04]

- 523 32. Jain SS, Steele JM, Fonseca B, et al. COVID-19 Vaccination-Associated Myocarditis in  
524 Adolescents. *Pediatrics* 2021;148(5) doi: 10.1542/peds.2021-053427 [published  
525 Online First: 2021/08/15]
- 526 33. Marshall M, Ferguson ID, Lewis P, et al. Symptomatic Acute Myocarditis in 7 Adolescents  
527 After Pfizer-BioNTech COVID-19 Vaccination. *Pediatrics* 2021;148(3) doi:  
528 10.1542/peds.2021-052478 [published Online First: 2021/06/06]
- 529 34. McLean K, Johnson TJ. Myopericarditis in a previously healthy adolescent male following  
530 COVID-19 vaccination: A case report. *Acad Emerg Med* 2021;28(8):918-21. doi:  
531 10.1111/acem.14322 [published Online First: 2021/06/17]
- 532 35. Minocha PK, Better D, Singh RK, et al. Recurrence of Acute Myocarditis Temporally  
533 Associated with Receipt of the mRNA Coronavirus Disease 2019 (COVID-19) Vaccine  
534 in a Male Adolescent. *J Pediatr* 2021;238:321-23. doi: 10.1016/j.jpeds.2021.06.035  
535 [published Online First: 2021/06/25]
- 536 36. Park J, Brekke DR, Bratincsak A. Self-limited myocarditis presenting with chest pain and  
537 ST segment elevation in adolescents after vaccination with the BNT162b2 mRNA  
538 vaccine. *Cardiol Young* 2021:1-4. doi: 10.1017/S1047951121002547 [published  
539 Online First: 2021/06/29]
- 540 37. Schauer J, Buddhe S, Colyer J, et al. Myopericarditis After the Pfizer Messenger  
541 Ribonucleic Acid Coronavirus Disease Vaccine in Adolescents. *J Pediatr*  
542 2021;238:317-20. doi: 10.1016/j.jpeds.2021.06.083 [published Online First:  
543 2021/07/07]
- 544 38. Shaw KE, Cavalcante JL, Han BK, et al. Possible Association Between COVID-19 Vaccine  
545 and Myocarditis: Clinical and CMR Findings. *JACC Cardiovasc Imaging*  
546 2021;14(9):1856-61. doi: 10.1016/j.jcmg.2021.06.002 [published Online First:  
547 2021/07/12]
- 548 39. Snapiri O, Rosenberg Danziger C, Shirman N, et al. Transient Cardiac Injury in  
549 Adolescents Receiving the BNT162b2 mRNA COVID-19 Vaccine. *Pediatr Infect Dis J*  
550 2021;40(10):e360-e63. doi: 10.1097/INF.0000000000003235 [published Online First:  
551 2021/06/03]
- 552 40. Starekova J, Bluemke DA, Bradham WS, et al. Myocarditis Associated with mRNA COVID-  
553 19 Vaccination. *Radiology* 2021;301(2):E409-E11. doi: 10.1148/radiol.2021211430  
554 [published Online First: 2021/07/21]
- 555 41. Tano E, San Martin S, Girgis S, et al. Perimyocarditis in Adolescents After Pfizer-BioNTech  
556 COVID-19 Vaccine. *J Pediatric Infect Dis Soc* 2021;10(10):962-66. doi:  
557 10.1093/jpids/piab060 [published Online First: 2021/07/29]
- 558 42. Patel T, Kelleman M, West Z, et al. Comparison of MIS-C Related Myocarditis, Classic  
559 Viral Myocarditis, and COVID-19 Vaccine related Myocarditis in Children. *medRxiv*  
560 2021:2021.10.05.21264581. doi: 10.1101/2021.10.05.21264581
- 561 43. Ambati S, Colon M, Mihic M, et al. Acute Myopericarditis after COVID-19 Vaccine in  
562 Teenagers. *Case Rep Cardiol* 2021;2021:8268755. doi: 10.1155/2021/8268755  
563 [published Online First: 2021/10/01]
- 564 44. Lane S, Yeomans A, Shakir S. Reports of myocarditis and pericarditis following mRNA  
565 COVID-19 vaccines: A review of spontaneously reported data from the UK, Europe,  
566 and the US. *medRxiv* 2021:2021.09.09.21263342. doi: 10.1101/2021.09.09.21263342
- 567 45. Klein NP. Rapid Cycle Analysis to Monitor the Safety of COVID-19 Vaccines in Near Real-  
568 Time within the Vaccine Safety Datalink: Myocarditis and Anaphylaxis: Centers for  
569 Disease Control, 2021.

- 570 46. Klein NP. Myocarditis Analyses in the Vaccine Safety Datalink: Rapid Cycle Analyses and  
571 “Head-to-Head” Product Comparisons: Centres for Disease Control, 2021.
- 572 47. Oster M. mRNA COVID-19 Vaccine-Associated Myocarditis: Centres for Disease Control,  
573 2021.
- 574 48. United States Department of Health and Human Services (US DHHS), Centers for Disease  
575 Control and Prevention (CDC), National Center for Health Statistics (NCHS).  
576 Underlying Cause of Death 1999-2019 on CDC WONDER Online Database, released  
577 2020. In: United States Department of Health and Human Services (US DHHS)  
578 CfDCaPC, National Center for Health Statistics (NCHS), ed.: Centers for Disease  
579 Control and Prevention (CDC), 2021.
- 580 49. Motta M, Stecula D. Quantifying the effect of Wakefield et al. (1998) on skepticism  
581 about MMR vaccine safety in the U.S. *PloS one* 2021;16(8):e0256395. doi:  
582 10.1371/journal.pone.0256395 [published Online First: 20210819]
- 583 50. Story MT, Neumark-Stzainer DR, Sherwood NE, et al. Management of child and  
584 adolescent obesity: attitudes, barriers, skills, and training needs among health care  
585 professionals. *Pediatrics* 2002;110(1 Pt 2):210-14.
- 586 51. Henrina J, Putra ICS, Lawrensia S, et al. Cardiac Manifestations, Treatment  
587 Characteristics, and Outcomes of Paediatric Inflammatory Multisystem Syndrome  
588 Temporally Associated with Severe Acute Respiratory Syndrome Coronavirus-2:  
589 systematic review of case reports and case series. *Prog Pediatr Cardiol* 2021:101365.  
590 doi: 10.1016/j.ppedcard.2021.101365 [published Online First: 2021/02/16]
- 591 52. Rodriguez-Gonzalez M, Castellano-Martinez A, Cascales-Poyatos HM, et al.  
592 Cardiovascular impact of COVID-19 with a focus on children: A systematic review.  
593 *World J Clin Cases* 2020;8(21):5250-83. doi: 10.12998/wjcc.v8.i21.5250 [published  
594 Online First: 2020/12/04]
- 595 53. Smith C, Odd D, Harwood R, et al. Deaths in children and young people in England after  
596 SARS-CoV-2 infection during the first pandemic year. *Nat Med* 2021 doi:  
597 10.1038/s41591-021-01578-1 [published Online First: 20211111]
- 598 54. Vasudeva R, Bhatt P, Lilje C, et al. Trends in Acute Myocarditis Related Pediatric  
599 Hospitalizations in the United States, 2007-2016. *Am J Cardiol* 2021;149:95-102. doi:  
600 10.1016/j.amjcard.2021.03.019 [published Online First: 2021/03/25]
- 601 55. Lota A, Fazal S, Wassall R, et al. National Trends in the Epidemiology of Hospital  
602 Admissions for Acute Myocarditis: Insights from the Uk National Health Service.  
603 *Journal of the American College of Cardiology* 2018;71(11):A875-A75. doi:  
604 10.1016/s0735-1097(18)31416-5
- 605 56. Wu MH, Wu ET, Wang CC, et al. Contemporary Postnatal Incidence of Acquiring Acute  
606 Myocarditis by Age 15 Years and the Outcomes From a Nationwide Birth Cohort.  
607 *Pediatr Crit Care Med* 2017;18(12):1153-58. doi: 10.1097/PCC.0000000000001363  
608 [published Online First: 2017/10/27]
- 609 57. Chou FS, Ghimire LV. Identification of prognostic factors for pediatric myocarditis with a  
610 random forests algorithm-assisted approach. *Pediatr Res* 2021;90(2):427-30. doi:  
611 10.1038/s41390-020-01268-7 [published Online First: 2020/11/20]
- 612 58. Engler RJ, Nelson MR, Collins LC, Jr., et al. A prospective study of the incidence of  
613 myocarditis/pericarditis and new onset cardiac symptoms following smallpox and  
614 influenza vaccination. *PLoS One* 2015;10(3):e0118283. doi:  
615 10.1371/journal.pone.0118283 [published Online First: 2015/03/21]



- 616 59. Kuntz J, Crane B, Weinmann S, et al. Myocarditis and pericarditis are rare following live  
617 viral vaccinations in adults. *Vaccine* 2018;36(12):1524-27. doi:  
618 10.1016/j.vaccine.2018.02.030 [published Online First: 2018/02/20]
- 619 60. Su JR, McNeil MM, Welsh KJ, et al. Myopericarditis after vaccination, Vaccine Adverse  
620 Event Reporting System (VAERS), 1990-2018. *Vaccine* 2021;39(5):839-45. doi:  
621 10.1016/j.vaccine.2020.12.046 [published Online First: 2021/01/11]
- 622 61. Johns Hopkins Bloomberg School of Public Health. Clinical presentation & Prognostic risk  
623 factors, vaccines: SARS-CoV-2 mRNA Vaccination-Associated Myocarditis in Children  
624 Ages 12-17: A Stratified National Database Analysis 2021 [Available from:  
625 [https://ncrc.jhsph.edu/research/sars-cov-2-mrna-vaccination-associated-](https://ncrc.jhsph.edu/research/sars-cov-2-mrna-vaccination-associated-myocarditis-in-children-ages-12-17-a-stratified-national-database-analysis/)  
626 [myocarditis-in-children-ages-12-17-a-stratified-national-database-analysis/](https://ncrc.jhsph.edu/research/sars-cov-2-mrna-vaccination-associated-myocarditis-in-children-ages-12-17-a-stratified-national-database-analysis/) accessed  
627 06/10/2021.
- 628 62. Shimabukuro TT, Nguyen M, Martin D, et al. Safety monitoring in the Vaccine Adverse  
629 Event Reporting System (VAERS). *Vaccine* 2015;33(36):4398-405. doi:  
630 10.1016/j.vaccine.2015.07.035 [published Online First: 2015/07/22]
- 631 63. Munro C. Covid-19: Boys are more at risk of myocarditis after vaccination than of  
632 hospital admission for covid. *BMJ* 2021;374:n2251. doi: 10.1136/bmj.n2251  
633 [published Online First: 2021/09/16]
- 634 64. English C. FDA-Approved Shots Dangerous? VAERS Database Continues To Make Vaccine  
635 Skeptics Look Foolish: American Council on Science and Health; 2021 [updated 4  
636 June 2021;18 November 2021]. Available from:  
637 [https://www.acsh.org/news/2021/06/04/fda-approved-shots-dangerous-vaers-](https://www.acsh.org/news/2021/06/04/fda-approved-shots-dangerous-vaers-database-continues-make-vaccine-skeptics-look-foolish-15583)  
638 [database-continues-make-vaccine-skeptics-look-foolish-15583](https://www.acsh.org/news/2021/06/04/fda-approved-shots-dangerous-vaers-database-continues-make-vaccine-skeptics-look-foolish-15583).
- 639

640 Figure 1. PRISMA search flowchart

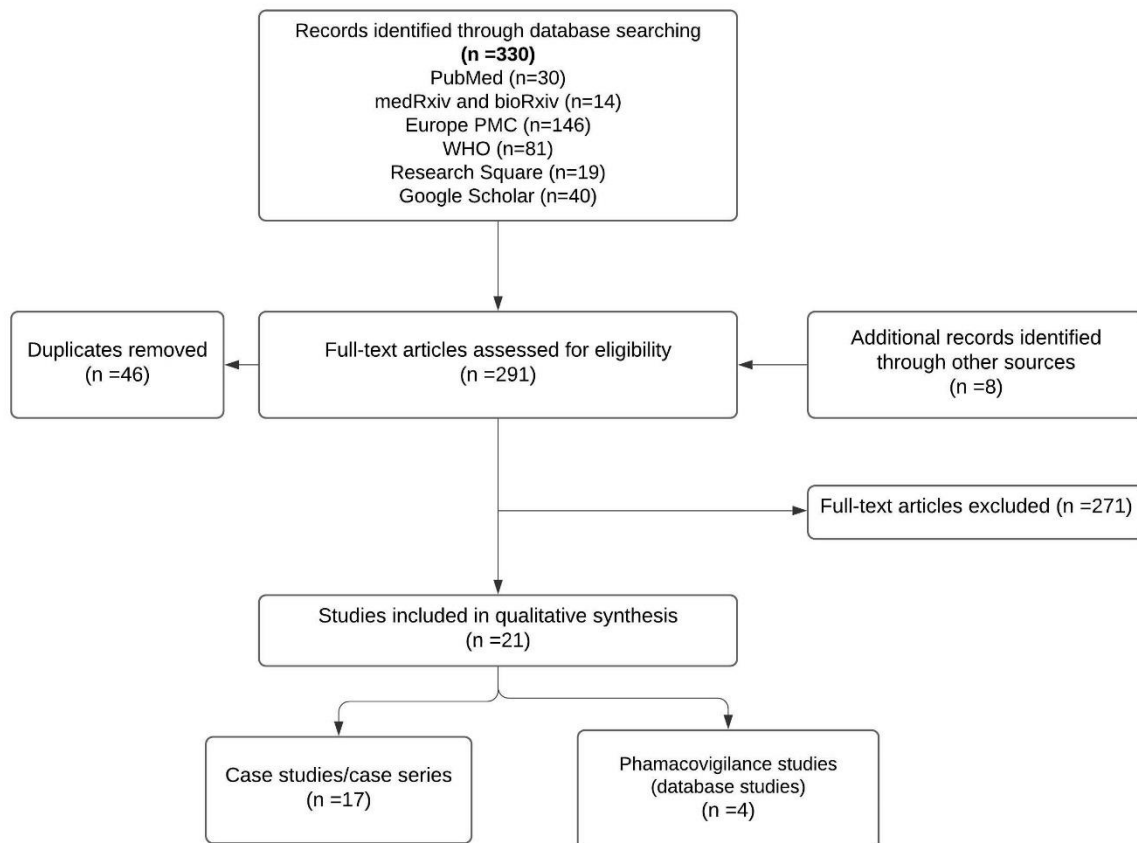

641

642 **Table 1** - Characteristics and outcomes of the studies describing patients with cardiac adverse effects (myocarditis, pericarditis or myopericarditis  
 643 related to COVID-19 vaccination.

| Study                               | Type of study | Number of cases | Case source            | Male sex (%) | Age, years (range) | Vaccine type       | % Patients presenting after second vaccination | Time between last vaccine and symptom onset, median days (range) | % Patients with symptoms resolved | Median hospitalisation, days (range) |
|-------------------------------------|---------------|-----------------|------------------------|--------------|--------------------|--------------------|------------------------------------------------|------------------------------------------------------------------|-----------------------------------|--------------------------------------|
| <sup>31</sup>                       | Case report   | 1               | Single centre, Germany | 100          | 16                 | BNT 162b2 (Pfizer) | 100                                            | 1                                                                | NR                                | 7                                    |
| McLean and Johnson <sup>34</sup>    | Case report   | 1               | Single centre, USA     | 100          | 16                 | BNT 162b2 (Pfizer) | 100                                            | 3                                                                | 100                               | 6                                    |
| Minocha, et al. <sup>35</sup>       | Case report   | 1               | Single centre, USA     | 100          | 17                 | BNT 162b2 (Pfizer) | 100                                            | 2                                                                | 100                               | 6                                    |
| Starekova, et al. <sup>40</sup>     | Case report   | 1               | Single centre, USA     | 100          | 17                 | BNT 162b2 (Pfizer) | 100                                            | 2                                                                | NR                                | NR                                   |
| Abu Mouch, et al. <sup>27</sup>     | Case report   | 2               | Single centre, Israel  | 100          | 16.5 (16-17)       | BNT 162b2 (Pfizer) | 100                                            | 2 (1-3)                                                          | 100                               | 6 (5-7)                              |
| Fleming-Nouri, et al. <sup>30</sup> | Case report   | 2               | Single centre, USA     | 100          | 16.5 (16-17)       | BNT 162b2 (Pfizer) | 100                                            | 4.5 (2-7)                                                        | NR                                | 3 (2-4)                              |
| Park, et al. <sup>36</sup>          | Case report   | 2               | Single centre, USA     | 100          | 15.5 (15-16)       | BNT 162b2 (Pfizer) | 50                                             | 2.5 (2-3)                                                        | 100                               | 4                                    |
| Shaw, et al. <sup>38</sup>          | Case report   | 2               | Multiple centres, USA  | 50           | 17 (16-17)         | BNT 162b2 (Pfizer) | 50                                             | 3 (2-4)                                                          | NR                                | NR                                   |
| Ambati, et al. <sup>43</sup>        | Case report   | 2               | Single centre, USA     | 100          | 17 (16-17)         | BNT 162b2 (Pfizer) | 100                                            | 2.5 (2-3)                                                        | 100                               | 3                                    |
| Marshall, et al. <sup>33</sup>      | Case report   | 5               | Multiple centres, USA  | 100          | 16 (14-17)         | BNT 162b2 (Pfizer) | 100                                            | 2 (2-3)                                                          | NR                                | 3.5 (2-5)                            |

|                               |             |    |                          |     |                                                                            |                                        |      |           |     |           |
|-------------------------------|-------------|----|--------------------------|-----|----------------------------------------------------------------------------|----------------------------------------|------|-----------|-----|-----------|
| Snapiri, et al. <sup>39</sup> | Case report | 7  | Multiple centres, Israel | 100 | 16 (16-17)                                                                 | BNT 162b2 (Pfizer)                     | 86   | 2 (1-3)   | NR  | 5 (3-6)   |
| Tano, et al. <sup>41</sup>    | Case report | 8  | Single centre, USA       | 100 | 16 (15-17)                                                                 | BNT 162b2 (Pfizer)                     | 75   | 3 (1-14)  | NR  | 2.5 (1-4) |
| Patel, et al. <sup>42</sup>   | Case series | 9  | Single centre, USA       | 100 | 15.7 (IQR: 14.5; 16.6)                                                     | Not identified                         | 89   | 3         | 100 | NR        |
| Schauer, et al. <sup>37</sup> | Case report | 13 | Single centre, USA       | 92  | 15 (12-17)                                                                 | BNT 162b2 (Pfizer)                     | 100* | 3 (2-4)   | 100 | 2 (1-4)   |
| Dionne, et al. <sup>29</sup>  | Case series | 15 | Single centre, USA       | 93  | 15 (12-18)                                                                 | BNT 162b2 (Pfizer)                     | 93   | 3 (1-6)   | 73  | 2 (1-5)   |
| Das, et al. <sup>28</sup>     | Case series | 25 | Multiple centres, USA    | 88  | 15 (12-17)                                                                 | BNT 162b2 (Pfizer)                     | 88   | 2 (<1-20) | 100 | 3 (1-7)   |
| Jain, et al. <sup>32</sup>    | Case series | 31 | Multiple centres, USA    | 87  | 12-15. Note that an additional 32 cases aged 16-20y were not included here | BNT 162b2 (Pfizer) mRNA-1273 (Moderna) | 97   | 1.9 (1-3) | NR  | 2.8 (1-5) |

644

645 NR – Not Reported

646 \*The authors only considered patients presenting myocarditis after the 2<sup>nd</sup> dose of the vaccine

647 **Table 2** - Summary of the most common symptoms presented by patients diagnosed with car-  
648 *diac adverse effects after being vaccinated against SARS-CoV-2*  
649

|                                                | N   | Number of patients (%) |
|------------------------------------------------|-----|------------------------|
| <b>Symptoms at hospital admission</b>          | 127 |                        |
| Chest pain                                     | 127 | 126 (99.2)             |
| Fever                                          | 127 | 44 (34.6)              |
| Shortness of breath                            | 127 | 26 (20.5)              |
| Weakness                                       | 127 | 22 (17.3)              |
| Headache                                       | 127 | 21 (16.5)              |
| Myalgia                                        | 127 | 18 (14.2)              |
| Nausea                                         | 127 | 11 (8.7)               |
| Vomiting                                       | 127 | 5 (3.9)                |
| Chills                                         | 127 | 5 (3.9)                |
| Tachycardia                                    | 127 | 4 (3.1)                |
| Diaphoresis                                    | 127 | 1 (0.8)                |
| Syncope                                        | 127 | 1 (0.8)                |
| Tingling of fingers                            | 127 | 1 (0.8)                |
| <b>Laboratory analysis</b>                     |     |                        |
| Elevated Troponin                              | 127 | 127 (100)              |
| Elevated C-Reactive Protein                    | 95  | 92 (96.8)              |
| <b>Electrocardiogram (ECG)</b>                 | 126 |                        |
| Abnormal                                       | 126 | 93 (73.8)              |
| Diffuse ST changes                             | 126 | 21 (16.7)              |
| ST segment elevation                           | 126 | 55 (43.7)              |
| T-wave inversion                               | 126 | 8 (6.3)                |
| <b>Echocardiogram (Echo)</b>                   | 124 |                        |
| Systolic or diastolic dysfunction              | 124 | 7 (5.6)                |
| Pericardial effusion                           | 124 | 14 (11.3)              |
| <b>Cardiovascular magnetic resonance (CMR)</b> | 91  |                        |
| Systolic or diastolic dysfunction              | 91  | 7 (7.7)                |
| Increased wall thickness                       | 91  | 2 (2.2)                |
| Pericardial effusion                           | 91  | 19 (20.9)              |
| Myocardial oedema                              | 91  | 56 (61.5)              |
| Late gadolinium enhancement (LGE)              | 91  | 82 (90.1)              |
| <b>Treatment</b>                               | 121 |                        |
| NSAID                                          | 121 | 92 (76.0)              |

|                       |     |           |
|-----------------------|-----|-----------|
| IVIG                  | 121 | 24 (19.8) |
| Steroid               | 121 | 18 (14.9) |
| Colchicine            | 121 | 3 (2.5)   |
| Famotidine            | 121 | 3 (2.5)   |
| Aspirin (low dose)    | 121 | 2 (1.7)   |
| Enalapril             | 121 | 2 (1.7)   |
| Spirolactone          | 121 | 2 (1.7)   |
| Furosemide            | 121 | 2 (1.7)   |
| Vasopressor           | 121 | 2 (1.7)   |
| Narcotic              | 121 | 1 (0.8)   |
| No treatment required | 121 | 2 (1.7)   |

651 Table 3. Updated data on SARS-CoV-2 vaccination cardiac adverse effects (CAE) (myocarditis and pericarditis) from VAERS and EudraVigilance for  
 652 children and young people aged between 6 and 17 years old (VAERS) and 3 and 17 years old (EudraVigilance).  
 653

| Region |                        | Both sexes |            |            | Males     |           |            | Females   |           |            | Vaccination date (up to) | Reported CAE date (up to) |
|--------|------------------------|------------|------------|------------|-----------|-----------|------------|-----------|-----------|------------|--------------------------|---------------------------|
|        |                        | Dose 1     | Dose 2     | Total      | Dose 1    | Dose 2    | Total      | Dose 1    | Dose 2    | Total      |                          |                           |
| USA    |                        |            |            |            |           |           |            |           |           |            | 31/10/2021               | 31/10/2021                |
|        | Number of vaccinations | 13,634,026 | 11,475,125 | 25,109,151 | 6,683,248 | 5,585,905 | 12,269,153 | 6,950,778 | 5,889,220 | 12,839,998 |                          |                           |
|        | Myocarditis (N)        | 93         | 313        | 406        | 83        | 277       | 360        | 10        | 36        | 46         |                          |                           |
|        | Pericarditis (N)       | 30         | 90         | 120        | 22        | 81        | 103        | 8         | 9         | 17         |                          |                           |
| EU/EEA |                        |            |            |            |           |           |            |           |           |            | 06/11/2021               | 13/11/2021                |
|        | Number of vaccinations | 13,925,558 | 12,004,598 | 25,930,156 |           |           |            |           |           |            |                          |                           |
|        | Myocarditis (N)        | NA         | NA         | 723        | NA        | NA        | 626        | NA        | NA        | 97         |                          |                           |
|        | Pericarditis (N)       | NA         | NA         | 238        | NA        | NA        | 172        | NA        | NA        | 66         |                          |                           |

654

655

656 NA – no data available stratified by dose administered.

657 Figure 2 – Number of cases of myocarditis and pericarditis reported per 1,000,000 of SARS-  
658 CoV-2 vaccines administered to children and adolescents ( $\leq 17$  years old) reported to Eudra-  
659 Vigilance (EU/EEA) and Vaccine Adverse Event Reporting System (VAERS) (USA).  
660

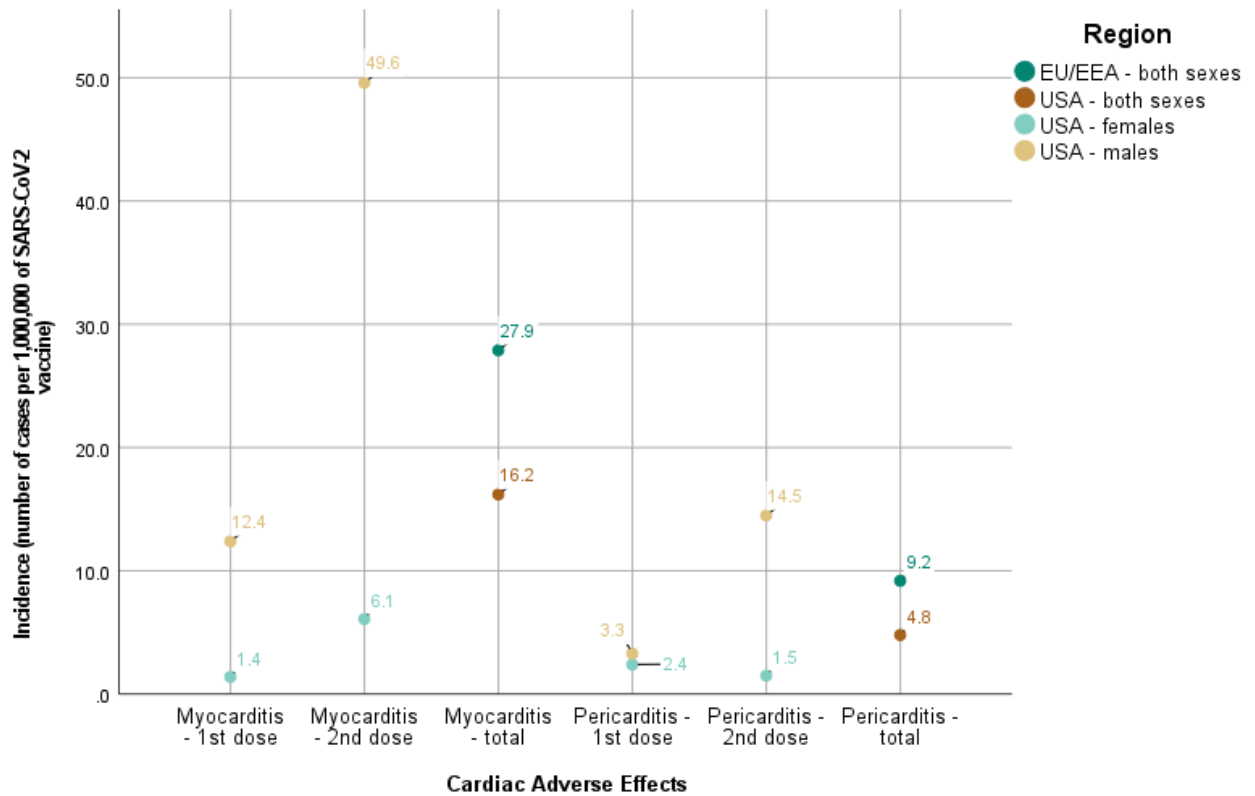

661

662



663 *Figure 3. Crude incidence of cases of myocarditis and pericarditis reported to the Vaccine Adverse Event Reporting System (VAERS) per million*  
664 *vaccines, by month of vaccination*

665 Panel A: Myocarditis

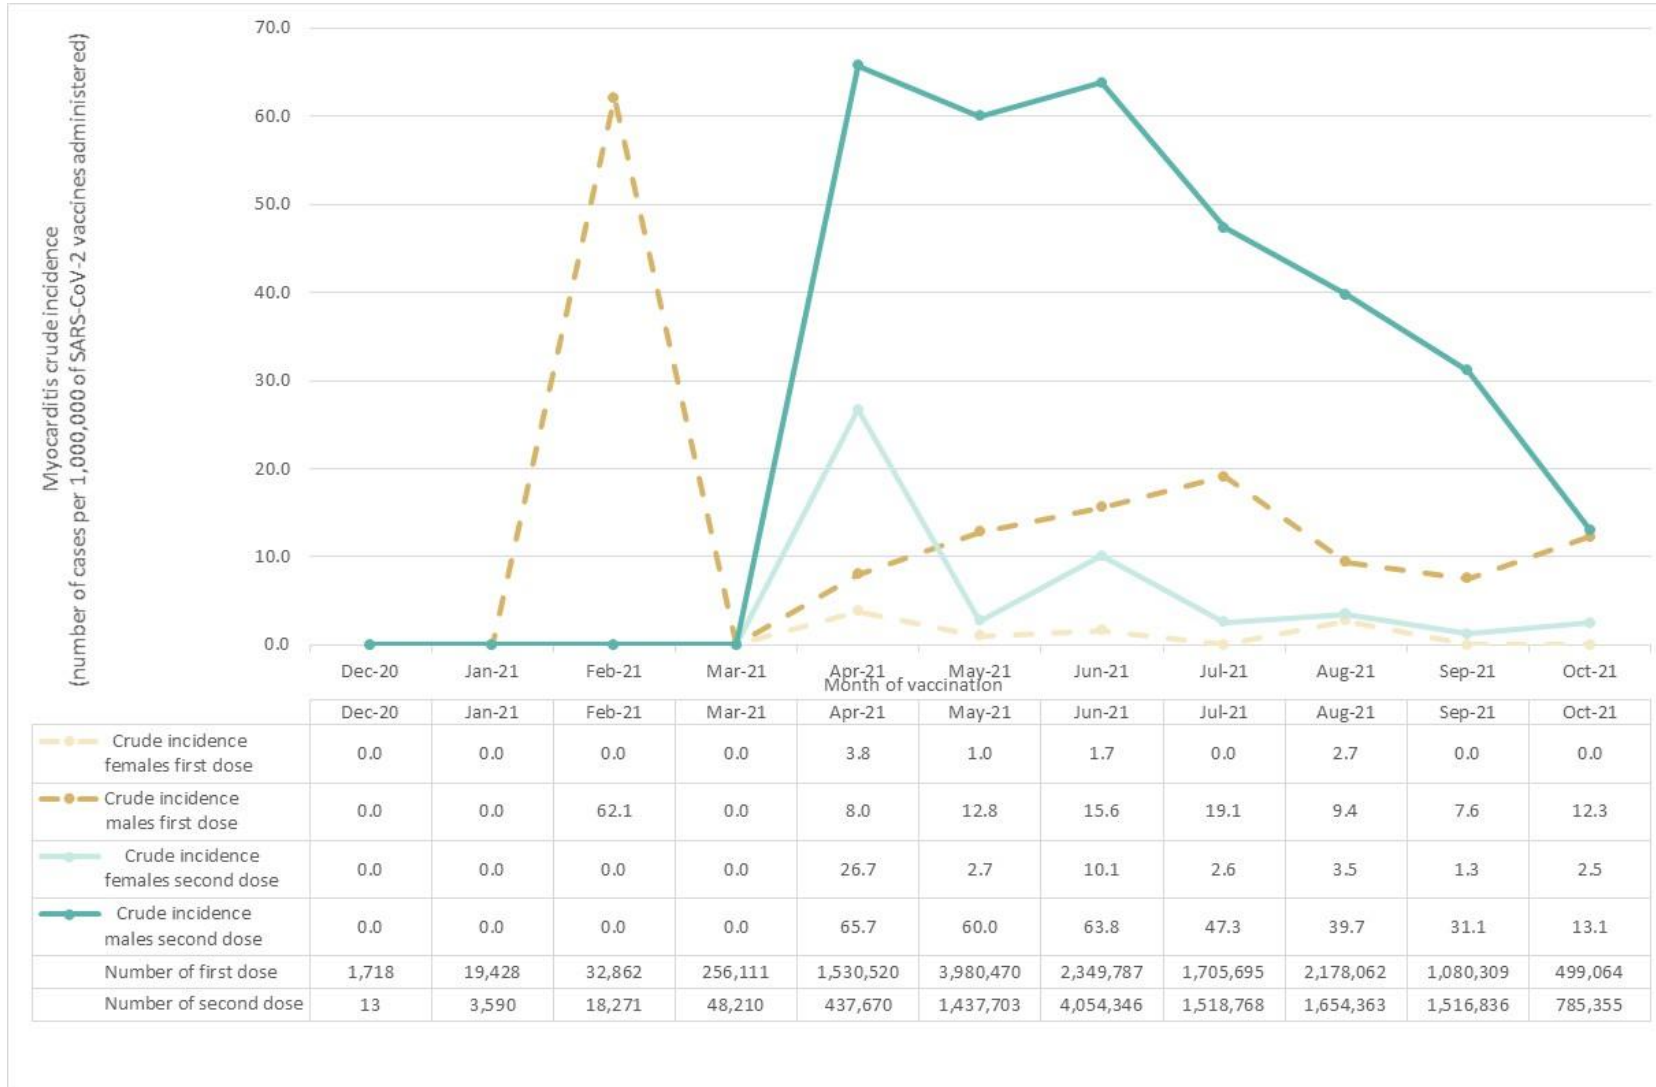

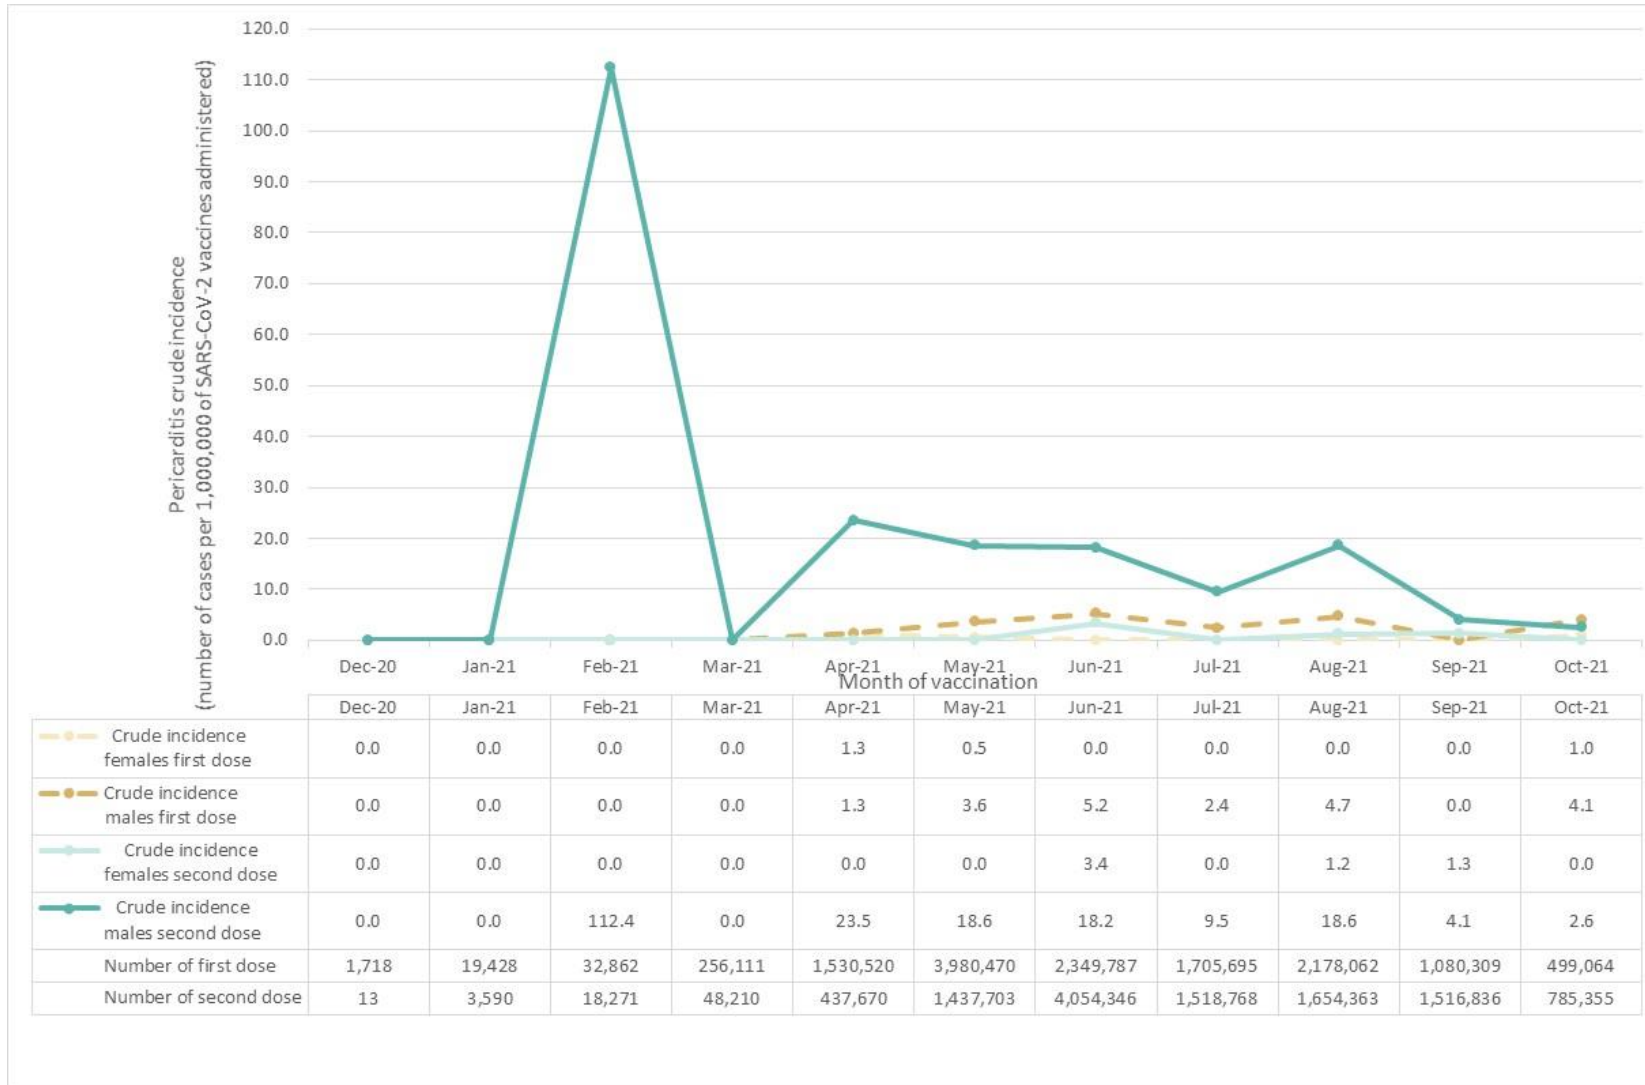

Source: https://www.medrxiv.org/content/medrxiv/early/2021/12/07/2021.12.06.21267339.full.pdf
