# Supplementary material for: Systematic review of cardiac adverse effects in children and young people under 18 years of age after SARS-CoV-2 vaccination
Source: bioRxiv or medRxiv preprint supplement (doi:10.1101/2021.12.06.21267339), 2021-12-07
Supplement: Supplementary file [file media-2.pdf]

| Topic         | Item | Checklist item description                                                                             | Isaak | McClellan | Minocha et al | Starekova | Abu Mouch et Fleming-Nouri Park | Shaw | Ambati | Marshall | Snapiiri et al. | Tano | Patel | Schauer et al. | Dionne et al. | Das | Jain et al. (2021) |    |
|---------------|------|--------------------------------------------------------------------------------------------------------|-------|-----------|---------------|-----------|---------------------------------|------|--------|----------|-----------------|------|-------|----------------|---------------|-----|--------------------|----|
| Title         | 1    | The diagnosis or intervention of primary focus followed by the words "case report"                     | 0     | 1         | 0             | 0         | 0                               | 0    | 0      | 0        | 0               | 0    | 0     | 0              | 0             | 1   | 0                  | 0  |
| Key Words     | 2    | 2 to 5 key words that identify diagnoses or interventions in this case report, including "case report" | 0     | 0         | 0             | 0         | 0                               | 0    | 0      | 0        | 0               | 0    | 0     | 0              | 0             | 0   | 0                  | 0  |
| Abstract      | 3a   | Introduction: What is unique about this case and what does it add to the scientific literature?        | 0     | 1         | 0             | 0         | 1                               | 0    | 1      | 1        | 1               | 1    | 1     | 1              | 0             | 1   | 1                  | 1  |
| (no referen   | 3b   | Main symptoms and/or important clinical findings                                                       | 0     | 1         | 0             | 0         | 1                               | 0    | 1      | 1        | 1               | 1    | 0     | 1              | 1             | 1   | 1                  | 1  |
|               | 3c   | The main diagnoses, therapeutic interventions, and outcomes                                            | 0     | 0         | 0             | 0         | 1                               | 0    | 1      | 0        | 1               | 1    | 0     | 0              | 0             | 1   | 1                  | 1  |
|               | 3d   | Conclusion-What is the main "take-away" lesson(s) from this case?                                      | 0     | 1         | 0             | 0         | 1                               | 0    | 1      | 1        | 1               | 1    | 0     | 0              | 0             | 1   | 1                  | 1  |
| Introducer    | 4    | One or two paragraphs summarizing why this case is unique (may include references)                     | 0     | 1         | 1             | 1         | 1                               | 1    | 1      | 1        | 1               | 1    | 0     | 1              | 1             | 1   | 1                  | 1  |
| Patient Info  | 5a   | De-identified patient specific information                                                             | 1     | 1         | 1             | 1         | 1                               | 1    | 1      | 1        | 1               | 1    | 1     | 1              | 1             | 1   | 1                  | 1  |
|               | 5b   | Primary concerns and symptoms of the patient                                                           | 1     | 1         | 1             | 1         | 1                               | 1    | 1      | 1        | 1               | 1    | 1     | 0              | 1             | 1   | 1                  | 1  |
|               | 5c   | Medical, family, and psycho-social history including relevant genetic information                      | 0     | 0         | 1             | 0         | 1                               | 0    | 1      | 1        | 1               | 0    | 1     | 0              | 0             | 0   | 1                  | 1  |
|               | 5d   | Relevant past interventions with outcomes                                                              | 0     | 0         | 0             | 0         | 0                               | 0    | 0      | 0        | 0               | 0    | 0     | 0              | 0             | 0   | 0                  | 0  |
| Clinical Find | 6    | Describe significant physical examination (PE) and important clinical findings                         | 0     | 1         | 1             | 1         | 1                               | 1    | 0      | 1        | 0               | 1    | 0     | 1              | 1             | 1   | 1                  | 0  |
| Timeline      | 7    | Historical and current information from this episode of care organized as a timeline                   | 0     | 0         | 0             | 0         | 0                               | 0    | 1      | 0        | 0               | 0    | 0     | 0              | 0             | 0   | 0                  | 0  |
| Diagnostic    | 8a   | Diagnostic testing (such as PE, laboratory testing, imaging, surveys).                                 | 1     | 1         | 1             | 1         | 1                               | 1    | 1      | 1        | 1               | 1    | 1     | 1              | 1             | 1   | 1                  | 1  |
|               | 8b   | Diagnostic challenges (such as access to testing, financial, or cultural)                              | 0     | 0         | 0             | 0         | 0                               | 0    | 0      | 0        | 0               | 0    | 0     | 0              | 0             | 0   | 0                  | 0  |
|               | 8c   | Diagnosis (including other diagnoses considered)                                                       | 1     | 1         | 1             | 1         | 1                               | 1    | 0      | 1        | 1               | 1    | 1     | 1              | 1             | 1   | 1                  | 1  |
|               | 8d   | Prognosis (such as staging in oncology) where applicable                                               | 0     | 0         | 0             | 0         | 0                               | 0    | 0      | 0        | 0               | 0    | 0     | 0              | 0             | 0   | 0                  | 0  |
| Therapeutic   | 9a   | Types of therapeutic intervention (such as pharmacologic, surgical, preventive, self-care)             | 0     | 1         | 1             | 0         | 1                               | 1    | 0      | 1        | 1               | 1    | 1     | 1              | 1             | 1   | 1                  | 1  |
|               | 9b   | Administration of therapeutic intervention (such as dosage, strength, duration)                        | 0     | 0         | 0             | 0         | 0                               | 0    | 0      | 0        | 1               | 0    | 0     | 0              | 0             | 1   | 0                  | 0  |
|               | 9c   | Changes in therapeutic intervention (with rationale)                                                   | 0     | 0         | 0             | 0         | 0                               | 0    | 0      | 0        | 0               | 0    | 0     | 0              | 0             | 0   | 0                  | 0  |
| Follow-up a   | 10a  | Clinician and patient-assessed outcomes (if available)                                                 | 0     | 0         | 1             | 0         | 1                               | 1    | 0      | 0        | 1               | 1    | 0     | 1              | 1             | 1   | 1                  | 1  |
|               | 10b  | Important follow-up diagnostic and other test results                                                  | 0     | 0         | 1             | 0         | 0                               | 0    | 0      | 0        | 1               | 0    | 0     | 1              | 0             | 1   | 0                  | 1  |
|               | 10c  | Intervention adherence and tolerability (How was this assessed?)                                       | 0     | 0         | 0             | 0         | 0                               | 0    | 0      | 0        | 0               | 0    | 0     | 0              | 0             | 0   | 0                  | 0  |
|               | 10d  | Adverse and unanticipated events                                                                       | 0     | 0         | 0             | 0         | 0                               | 0    | 0      | 0        | 0               | 0    | 0     | 0              | 0             | 0   | 0                  | 0  |
| Discussion    | 11a  | A scientific discussion of the strengths AND limitations associated with this case report              | 0     | 1         | 0             | 1         | 0                               | 0    | 0      | 1        | 1               | 1    | 0     | 1              | 0             | 1   | 1                  | 1  |
|               | 11b  | Discussion of the relevant medical literature with references                                          | 1     | 1         | 1             | 1         | 1                               | 0    | 1      | 0        | 1               | 1    | 1     | 1              | 1             | 1   | 1                  | 1  |
|               | 11c  | The scientific rationale for any conclusions (including assessment of possible causes)                 | 0     | 1         | 1             | 0         | 1                               | 0    | 1      | 0        | 1               | 1    | 1     | 1              | 1             | 1   | 1                  | 1  |
|               | 11d  | The primary "take-away" lessons of this case report (without references) in a one paragraph cor        | 0     | 1         | 1             | 1         | 1                               | 0    | 0      | 1        | 1               | 1    | 1     | 1              | 1             | 1   | 0                  | 1  |
| Patient Pers: | 12   | The patient should share their perspective in one to two paragraphs on the treatment(s) they re        | 0     | 0         | 0             | 0         | 0                               | 0    | 0      | 1        | 0               | 0    | 0     | 0              | 0             | 0   | 0                  | 0  |
| Informed Cr   | 13   | Did the patient give informed consent? Please provide if requested . . . . .                           | 0     | 0         | 0             | 0         | 0                               | 0    | 0      | 0        | 0               | 0    | 0     | 0              | 0             | 0   | 0                  | 0  |
| TOTAL         |      |                                                                                                        | 5     | 15        | 13            | 9         | 16                              | 8    | 15     | 7        | 16              | 18   | 16    | 10             | 14            | 12  | 19                 | 16 |
